# Supplementary material for: Transcriptome analysis of peripheral blood of Schistosoma mansoni infected children from the Albert Nile region in Uganda reveals genes implicated in fibrosis pathology
Source: PubMed Central journal article supplement (PMC10686515; doi:10.1371/journal.pntd.0011455), 2023-11-15
Supplement: pntd.0011455.s003.pdf [file pntd.0011455.s003.pdf]

**S1 Table:** Table showing participant details for the RNAseq analysis

| Sample  | Sex    | Site     | Age | Height (cm) | Weight (Kg) | MUAC | HAZ   | BAZ   | POC-CCA | KK   | CAA(pg/ml) | Classification |
|---------|--------|----------|-----|-------------|-------------|------|-------|-------|---------|------|------------|----------------|
| PS722T  | Male   | Dei      | 11  | 131         | 32          | 20   | -1.8  | 0.8   | 3       | NA   | 934616.84  | High           |
| PS957T  | Male   | Kayonga  | 10  | 125         | 28          | 29   | -2.01 | 0.76  | 3       | 15   | 206112.64  | High           |
| PS349T  | Female | Nyakagei | 13  | 142         | 31          | 19.5 | -2.07 | -1.71 | 4       | 21.5 | 69301.61   | High           |
| PS336T  | Male   | Nyakagei | 12  | 132         | 31          | 22.5 | 0     | 0     | 4       | NA   | 21662.75   | High           |
| PS400T  | Male   | Nyakagei | 13  | 144         | 35          | 20   | -1.62 | -0.69 | 1       | 9    | 21471.1    | High           |
| PS345T  | Male   | Nyakagei | 10  | 116         | 21          | 16.5 | -3.42 | -0.52 | 4       | 17   | 20656.38   | High           |
| PS219T  | Male   | Kivuje   | 13  | 130         | 30          | 19   | -3.51 | -0.23 | 4       | 19.5 | 19675.41   | High           |
| PS773T  | Male   | Dei      | 15  | 151         | 37          | 19   | -1.55 | -1.79 | 4       | NA   | 15833.65   | High           |
| PS361T  | Female | Nyakagei | 12  | 135         | 25          | 19   | -2.37 | -2.52 | 4       | NA   | 15557.48   | High           |
| PS409T  | Male   | Nyakagei | 12  | 139         | 36          | 21   | -1.42 | 0.5   | 4       | 57   | 14722.97   | High           |
| PS303T  | Female | Nyakagei | 15  | 152         | 50          | 27   | -1.41 | 0.47  | 4       | 19.5 | 12979.69   | High           |
| PS378T  | Male   | Nyakagei | 11  | 132         | 30          | 18.6 | -1.65 | 0.15  | 4       | 93.5 | 12606.67   | High           |
| PS357T  | Female | Nyakagei | 12  | 139         | 30          | 19.5 | -1.79 | -1.25 | 4       | 15.5 | 12012.35   | High           |
| PS329T  | Male   | Nyakagei | 14  | 137         | 35          | 21.5 | -3.4  | -0.16 | 4       | 21.5 | 11612.61   | High           |
| PS949T  | Female | Kayonga  | 14  | 135         | 38          | 23   | -3.57 | 0.45  | 4       | 20.5 | 11410.18   | High           |
| PS189T  | Male   | Kivuje   | 14  | 139         | 41          | 23   | -3.14 | 0.83  | 4       | 34   | 11238.1    | High           |
| PS1016T | Male   | Kayonga  | 12  | 131         | 26          | 19   | -2.55 | -1.45 | 3       | 0    | 11049.34   | High           |
| PS343T  | Male   | Nyakagei | 10  | 124         | 21          | 16   | -2.16 | -2.07 | 4       | 37   | 10968.56   | High           |
| PS711T  | Female | Dei      | 10  | 130         | 25          | 16.5 | -1.35 | -1.03 | 3       | 52   | 10000      | High           |
| PS746T  | Female | Dei      | 10  | 120         | 21          | 15   | -2.91 | -1.17 | 3       | NA   | 10000      | High           |
| PS333T  | Female | Nyakagei | 12  | 128         | 25          | 19   | -3.4  | -1.41 | 4       | 2.5  | 9901.65    | High           |
| PS312T  | Female | Nyakagei | 14  | 151         | 42          | 22   | -1.27 | -0.46 | 4       | 8    | 9605.37    | High           |
| PS305T  | Female | Nyakagei | 15  | 152         | 46          | 23   | -1.41 | -0.11 | 4       | 6.5  | 9300.68    | High           |
| PS359T  | Male   | Nyakagei | 11  | 133         | 30          | 19.2 | -1.5  | 0.01  | 4       | 24   | 8556.76    | High           |

|        |        |          |    |     |    |      |       |       |     |      |         |      |
|--------|--------|----------|----|-----|----|------|-------|-------|-----|------|---------|------|
| PS348T | Female | Nyakagei | 11 | 140 | 34 | 21.3 | -0.75 | 0.05  | 4   | 18.5 | 6996.23 | High |
| PS304T | Female | Nyakagei | 15 | 154 | 51 | 25   | -1.11 | 0.43  | 1   | 2.5  | 6901.97 | High |
| PS220T | Male   | Kivuje   | 13 | 133 | 28 | 19   | -3.1  | -1.34 | 4   | 60.5 | 5001.64 | High |
| PS729T | Female | Dei      | 13 | 146 | 40 | 22.4 | -1.49 | -0.01 | 4   | 9.5  | 3371.01 | Low  |
| PS193T | Female | Kivuje   | 14 | 145 | 37 | 20   | -2.13 | -0.83 | 1   | 0.5  | 2156.6  | Low  |
| PS687T | Male   | Dei      | 10 | 116 | 23 | 17   | -3.42 | 0.35  | 3   | 7.5  | 2103.52 | Low  |
| PS256T | Female | Kivuje   | 12 | 142 | 33 | 19   | -1.35 | -0.77 | 1   | 6.5  | 1818.55 | Low  |
| PS373T | Female | Nyakagei | 10 | 129 | 24 | 17.8 | -1.51 | -1.28 | 1   | 1    | 1629.94 | Low  |
| PS951T | Male   | Kayonga  | 12 | 124 | 32 | 22   | -3.54 | 1.28  | 1   | 1.5  | 1422.64 | Low  |
| PS707T | Female | Dei      | 13 | 151 | 38 | 20.1 | -0.77 | -0.97 | 1   | NA   | 1152.97 | Low  |
| PS956T | Male   | Kayonga  | 12 | 144 | 36 | 20   | -0.72 | -0.09 | 1   | 0    | 830.32  | Low  |
| PS277T | Female | Kivuje   | 12 | 136 | 32 | 20   | -2.23 | -0.31 | 1   | 4.5  | 522.01  | Low  |
| PS758T | Female | Dei      | 10 | 119 | 23 | 17.4 | -3.07 | -0.19 | 1   | 0    | 367.29  | Low  |
| PS168T | Female | Kivuje   | 15 | 156 | 45 | 23   | -0.82 | -0.67 | 1   | 0    | 357.84  | Low  |
| PS767T | Male   | Dei      | 11 | 130 | 28 | 17.5 | -1.95 | -0.2  | 1   | NA   | 295.05  | Low  |
| PS272T | Male   | Kivuje   | 11 | 129 | 25 | 16   | -2.1  | -1.21 | 1   | 0    | 271.52  | Low  |
| PS702T | Female | Dei      | 12 | 146 | 43 | 24.3 | -0.76 | 0.8   | 1   | NA   | 241.21  | Low  |
| PS764T | Male   | Dei      | 11 | 126 | 26 | 18.2 | -2.54 | -0.31 | 0.5 | 1    | 167.67  | Low  |
| PS246T | Female | Kivuje   | 10 | 124 | 26 | 19   | -2.29 | 0.14  | 1   | 0    | 142.71  | Low  |
| PS223C | Male   | Kivuje   | 10 | 118 | 27 | 19   | -3.1  | 1.36  | 0   | 0    | 127.47  | Low  |
| PS353T | Male   | Nyakagei | 12 | 136 | 28 | 18.5 | -1.85 | -1.46 | 1   | 0    | 20.05   | Neg  |
| PS534C | Female | Alwi     | 14 | 152 | 40 | 21   | -1.12 | -0.96 | 0   | 0    | 13.32   | Neg  |
| PS513C | Male   | Alwi     | 12 | 150 | 32 | 22   | 0.13  | -2.2  | 0   | 0    | 11.9    | Neg  |
| PS750T | Male   | Dei      | 12 | 140 | 32 | 17.5 | -1.28 | -0.66 | 0.5 | NA   | 11.38   | Neg  |
| PS417T | Male   | Nyakagei | 10 | 123 | 23 | 16.5 | -2.32 | -0.8  | 1   | 0    | 10.95   | Neg  |
| PS506C | Male   | Alwi     | 11 | 136 | 31 | 21   | -1.06 | -0.1  | 0   | 0    | 9.09    | Neg  |
| PS544C | Male   | Alwi     | 11 | 122 | 21 | 18   | -3.14 | -1.95 | 0   | 0    | 7.79    | Neg  |
| PS941T | Male   | Kayonga  | 10 | 122 | 26 | 21   | -2.48 | 0.54  | 0.5 | 0    | 7.1     | Neg  |

|        |        |         |    |     |    |      |       |       |     |   |      |     |
|--------|--------|---------|----|-----|----|------|-------|-------|-----|---|------|-----|
| PS736C | Female | Dei     | 10 | 122 | 29 | 20   | -2.6  | 1.15  | 0   | 0 | 6.18 | Neg |
| PS541C | Female | Alwi    | 11 | 129 | 25 | 18   | -2.41 | -1.2  | 0   | 0 | 4.98 | Neg |
| PS535C | Female | Alwi    | 13 | 162 | 48 | 27   | 0.81  | -0.21 | 0   | 0 | 4.12 | Neg |
| PS549C | Female | Alwi    | 11 | 138 | 26 | 21   | -1.93 | -2.57 | 0   | 0 | 1.03 | Neg |
| PS536C | Female | Alwi    | 10 | 145 | 30 | 22   | 0.99  | -1.39 | 0   | 0 | 0.31 | Neg |
| PS974T | Male   | Kayonga | 11 | 143 | 36 | 22   | -0.02 | 0.34  | 0.5 | 0 | 0    | Neg |
| PS527C | Female | Alwi    | 14 | 160 | 38 | 22   | 0.03  | -2.4  | 0   | 0 | 0    | Neg |
| PS557C | Male   | Alwi    | 14 | 143 | 35 | 21   | -2.62 | -0.94 | 0   | 0 | 0    | Neg |
| PS569C | Male   | Alwi    | 13 | 144 | 31 | 21   | -1.62 | -1.99 | 0   | 0 | 0    | Neg |
| PS529C | Female | Alwi    | 12 | 140 | 27 | 19   | -1.64 | -2.47 | 0   | 0 | 0    | Neg |
| PS961C | Male   | Kayonga | 11 | 133 | 29 | 19   | -1.5  | -0.3  | 0   | 1 | 0    | Neg |
| PS714C | Male   | Dei     | 10 | 112 | 18 | 14.2 | -4.04 | -1.45 | 0   | 0 | 0    | Neg |
