# Supplementary material for: Transcriptome analysis of peripheral blood of Schistosoma mansoni infected children from the Albert Nile region in Uganda reveals genes implicated in fibrosis pathology
Source: PubMed Central journal article supplement (PMC10686515; doi:10.1371/journal.pntd.0011455), 2023-11-15
Supplement: pntd.0011455.s004.pdf [file pntd.0011455.s004.pdf]

**S2 Table:** Significant DEGs between children with high *S. mansoni* infection intensity compared to those with low infection intensity

| Comparison  | GeneName   | log2FoldChange | pvalue     | padj           | GeneType                       | GeneDescription                                            |
|-------------|------------|----------------|------------|----------------|--------------------------------|------------------------------------------------------------|
| High vs low | CCDC168    | 3.321          | 6.38E-06   | 0.003          | protein_coding                 | coiled-coil domain containing 168                          |
|             | AC005703.6 | 1.933          | 2.30E-06   | 0.002          | TEC                            | novel transcript                                           |
|             | LYPD8      | 1.639          | 0.00147792 | 0.040          | protein_coding                 | LY6/PLAUR domain containing 8                              |
|             | AC008505.1 | 1.464          | 0.0001769  | 0.015          | lncRNA                         | novel transcript                                           |
|             | AL358334.3 | 1.451          | 3.62E-07   | 0.001          | lncRNA                         | novel transcript, antisense to PYGL                        |
|             | NCF4-AS1   | 1.377          | 1.16E-06   | 0.002          | lncRNA                         | NCF4 antisense RNA 1                                       |
|             | CUEDC1     | 1.355          | 0.00028987 | 0.019          | protein_coding                 | CUE domain containing 1                                    |
|             | AC018552.2 | 1.350          | 0.00040215 | 0.022          | lncRNA                         | novel transcript, antisense to CCDC135 and GPR97           |
|             | PRMT7      | 1.330          | 0.00018046 | 0.015          | protein_coding                 | protein arginine methyltransferase 7                       |
|             | AP003064.1 | 1.318          | 2.46E-05   | 0.006          | lncRNA                         | novel transcript                                           |
|             | GLOD5      | 1.272          | 0.00240429 | 0.050          | protein_coding                 | glyoxalase domain containing 5                             |
|             | AC021097.1 | 1.265          | 0.00017632 | 0.015          | lncRNA                         | novel transcript, antisense to SMARCD3                     |
|             | SP110      | 1.233          | 0.00048546 | 0.023          | protein_coding                 | SP110 nuclear body protein                                 |
|             | PCAT7      | 1.211          | 1.91E-07   | 0.001          | lncRNA                         | prostate cancer associated transcript 7                    |
|             | CCDC86     | 1.148          | 0.00084791 | 0.030          | protein_coding                 | coiled-coil domain containing 86                           |
|             | WFDC21P    | 1.141          | 0.00041477 | 0.022          | transcribed_unitary_pseudogene | WAP four-disulfide core domain 21, pseudogene              |
|             | PSMB7      | 1.086          | 1.74E-08   | 0.000          | protein_coding                 | proteasome 20S subunit beta 7                              |
|             | CCDC141    | 1.084          | 0.00091745 | 0.031          | protein_coding                 | coiled-coil domain containing 141                          |
|             | AC025278.1 | 1.075          | 0.00166842 | 0.041          | lncRNA                         | novel transcript, antisense to EMR4P                       |
|             | AL137186.1 | 1.069          | 2.40E-05   | 0.006          | lncRNA                         | novel transcript                                           |
|             | UQCC1      | 1.068          | 0.00088223 | 0.030          | protein_coding                 | ubiquinol-cytochrome c reductase complex assembly factor 1 |
|             | OGG1       | 1.065          | 4.61E-06   | 0.002          | protein_coding                 | 8-oxoguanine DNA glycosylase                               |
| DUS2        | 1.047      | 1.05E-06       | 0.002      | protein_coding | dihydrouridine synthase 2      |                                                            |

|  |             |        |            |       |                |                                                        |
|--|-------------|--------|------------|-------|----------------|--------------------------------------------------------|
|  | AP003031.3  | 1.046  | 0.00033627 | 0.020 | lncRNA         | novel transcript                                       |
|  | FAM170B-AS1 | 1.029  | 6.01E-05   | 0.009 | lncRNA         | FAM170B antisense RNA 1                                |
|  | KIF1B       | 1.027  | 5.57E-05   | 0.009 | protein_coding | kinesin family member 1B                               |
|  | C12orf65    | 1.027  | 0.00103422 | 0.032 | protein_coding | chromosome 12 open reading frame 65                    |
|  | AL049647.1  | 1.018  | 0.00115988 | 0.035 | lncRNA         | novel transcript                                       |
|  | PDZD8       | 1.014  | 0.00119263 | 0.036 | protein_coding | PDZ domain containing 8                                |
|  | AL132642.1  | 1.005  | 0.00062658 | 0.026 | lncRNA         | novel transcript, antisense to ASB2                    |
|  | MAMDC2      | -0.830 | 2.71E-05   | 0.006 | protein_coding | MAM domain containing 2                                |
|  | LINC00863   | -0.864 | 0.00080127 | 0.029 | lncRNA         | long intergenic non-protein coding RNA 863             |
|  | MALAT1      | -1.033 | 0.0009614  | 0.031 | lncRNA         | metastasis associated lung adenocarcinoma transcript 1 |
