# Supplementary material for: Transcriptome analysis of peripheral blood of Schistosoma mansoni infected children from the Albert Nile region in Uganda reveals genes implicated in fibrosis pathology
Source: PubMed Central journal article supplement (PMC10686515; doi:10.1371/journal.pntd.0011455), 2023-11-15
Supplement: pntd.0011455.s006.pdf [file pntd.0011455.s006.pdf]

**S4 Table:** DEGs associated with TGFB1

| Expression Gene | Count Publications | PubMed Ids                                                                                                                                                                                                                                                                                                                                                                                                                                      |
|-----------------|--------------------|-------------------------------------------------------------------------------------------------------------------------------------------------------------------------------------------------------------------------------------------------------------------------------------------------------------------------------------------------------------------------------------------------------------------------------------------------|
| BLM             | 48                 | 36949656,36944966,36082495,35427207,35149532,35013220,34890730,34515769,34439906,33940030,33864298,3277324,32917858,32894569,32884941,32848140,32377772,32233122,32017927,31953203,31907997,31840939,31701721,31535412,30988156,30709583,29971947,29943845,29926178,29642520,29079188,28860147,28752966,27154762,27153807,26777519,24769130,24028731,23980366,23327706,22486844,20945375,16648243,16445573,16415276,15770542,15059909,14694243, |
| THBS1           | 33                 | 36193307,35296614,34975404,34854257,34509740,33746571,33414684,32993645,32157392,31913855,31710666,31587040,30880778,30850588,30635789,30489086,29961094,29724129,29228113,28808111,26850833,26658711,26150894,24927163,23850146,23388410,21541268,21118800,19998449,19672301,16809437,16270194,14557872,                                                                                                                                       |
| MALAT1          | 12                 | 36852184,35433477,34769245,34326372,32203053,32067273,31432173,30635938,30154407,30146700,27565324,17006932,                                                                                                                                                                                                                                                                                                                                    |
| ITGA4           | 5                  | 30687812,28886030,28807052,22292410,22244633,                                                                                                                                                                                                                                                                                                                                                                                                   |
| OGG1            | 3                  | 32808374,31924810,25740678,                                                                                                                                                                                                                                                                                                                                                                                                                     |
| PGD             | 2                  | 25276836,8104872,                                                                                                                                                                                                                                                                                                                                                                                                                               |
| SUZ12           | 2                  | 26505792,26420484,                                                                                                                                                                                                                                                                                                                                                                                                                              |
| A1CF            | 1                  | 31022160,                                                                                                                                                                                                                                                                                                                                                                                                                                       |
| KIF1B           | 1                  | 31935498,                                                                                                                                                                                                                                                                                                                                                                                                                                       |
| TPT1            | 1                  | 35197550,                                                                                                                                                                                                                                                                                                                                                                                                                                       |
| UQCC1           | 1                  | 32244273,                                                                                                                                                                                                                                                                                                                                                                                                                                       |
