# Supplementary material for: Transcriptome analysis of peripheral blood of Schistosoma mansoni infected children from the Albert Nile region in Uganda reveals genes implicated in fibrosis pathology
Source: PubMed Central journal article supplement (PMC10686515; doi:10.1371/journal.pntd.0011455), 2023-11-15
Supplement: pntd.0011455.s007.pdf [file pntd.0011455.s007.pdf]

**S5 Table:** Expressed genes in stunting and BMI

| <b>GeneName</b> | <b>log2<br/>FoldChange</b> | <b>pvalue</b> | <b>padj</b> | <b>Up/Down</b> | <b>Gene Description</b>                | <b>Phenotype</b> |
|-----------------|----------------------------|---------------|-------------|----------------|----------------------------------------|------------------|
| NCEH1           | 1.281                      | 1.81E-06      | 0.031       | Up             | neutral cholesterol ester hydrolase 1  | Stunting         |
| MUC5B           | 1.103                      | 2.00E-06      | 0.0299      | Up             | mucin 5B, oligomeric mucus/gel-forming | BMI              |
| DMD             | 1.139                      | 1.33E-05      | 0.042       | Up             | dystrophin                             | BMI              |
| REXO1L1P        | 1.300                      | 1.42E-05      | 0.043       | Up             | REXO1 like 1, pseudogene               | BMI              |
| SERPINA10       | -1.127                     | 3.46E-06      | 0.0299      | Down           | serpin family A member 10              | BMI              |
