# Supplementary material for: Transcriptome analysis of peripheral blood of Schistosoma mansoni infected children from the Albert Nile region in Uganda reveals genes implicated in fibrosis pathology
Source: PubMed Central journal article supplement (PMC10686515; doi:10.1371/journal.pntd.0011455), 2023-11-15
Supplement: pntd.0011455.s008.pdf [file pntd.0011455.s008.pdf]

**S6 Table:** Cell types that differ in relative abundance between *S. mansoni* infected and uninfected children

| <b>Cell type</b> | <b>P-value (T-test)</b> | <b>Difference (IU)</b> |
|------------------|-------------------------|------------------------|
| MPP              | 0.012438795             | -0.013754584           |
| erythrocytes     | 0.059665337             | -0.06188862            |
| Plasma cells     | 0.111802411             | 0.005298362            |
| hMDP             | 0.122909261             | 0.015039638            |
