# Supplementary material for: Transcriptome analysis of peripheral blood of Schistosoma mansoni infected children from the Albert Nile region in Uganda reveals genes implicated in fibrosis pathology
Source: PubMed Central journal article supplement (PMC10686515; doi:10.1371/journal.pntd.0011455), 2023-11-15
Supplement: pntd.0011455.s009.pdf [file pntd.0011455.s009.pdf]

## S\_Data Analysis Script: RNA Sequence data

```
setwd("~/Desktop/Albert_finalRNAseq")

#if (!requireNamespace("BiocManager", quietly=TRUE))
  install.packages("BiocManager")
if (!require("BiocManager"))
  install.packages("BiocManager")
  BiocManager::install("bigPint")
#BiocManager::install("DESeq2")
#BiocManager::install("pcaExplorer")
library(pcaExplorer)
library(DESeq2)

directory<- "~/Desktop/Albert_finalRNAseq"

#Name of file with Filename, sample name, phenotype, sex as attached example

#phenoFile = "All_CAA_CasCon.txt"
#phenoFile = "HAZ_pheno.txt"
#phenoFile = "BMI_pheno.txt"
phenoFile = "ALLcascon.txt"
#phenoFile = "ALLcascon_HC.txt"
#phenoFile = "ALLcascon_HL.txt"
#phenoFile = "ALLcascon_LC.txt

#Get files for each phenotype into lists
#load the phenotype file
phenodata = as.data.frame(read.table(phenoFile, header=TRUE, sep ="\t"))
phenodata$Sex = as.factor(phenodata$Sex)
#phenodata$Age = as.factor(phenodata$Age)
phenodata$Pheno = as.factor(phenodata$Pheno.CAA.)

#create data frame of files
sampleTable <- data.frame(sampleName = phenodata$Sample,
  fileName = phenodata$File,
  pheno = phenodata$Pheno.CAA.,
  #BMI = phenodata$BAZ,
  #stunt = phenodata$HAZ,
  sex = phenodata$Sex,
  age = factor(cut(phenodata$Age, breaks = 3, labels = FALSE))),
  #stg = phenodata$Stunt.grp)
  #stunt.grp = factor(cut(phenodata$HAZ, breaks = 3, labels = FALSE)),
  #BMI.grp = factor(cut(phenodata$BAZ, breaks = 3, labels = FALSE))),
  #CAA = (cut (log(phenodata$CAA + 1), breaks = 3, labels = FALSE)))
  #Split log P. falciparum infection into 3 equal size groups.
  #Pfa = factor(cut(log(phenodata$Pfa), breaks = 3, labels = FALSE)))

#sampleTable$pheno <- factor(sampleTable$pheno)
#Check structure of sampleTable
str(sampleTable)
```

```

#create a DESeq data set (dds) from data frame
ddsHTSeq <- DESeqDataSetFromHTSeqCount(sampleTable = sampleTable,
                                       directory = directory,
                                       design = ~ pheno + sex + age)

ddsHTSeq <- DESeqDataSetFromHTSeqCount(sampleTable = sampleTable,
                                       directory = directory,
                                       design = ~ BMI + sex)

ddsHTSeq <- DESeqDataSetFromHTSeqCount(sampleTable = sampleTable,
                                       directory = directory,
                                       design = ~ stunt + sex)

#Check structure of Dataset
str(ddsHTSeq)

ddsHTSeq
#Filter out genes with minimal data
keep <- rowSums(counts(ddsHTSeq)) >= 100
ddsHTSeq <- ddsHTSeq[keep,]
summary(counts(ddsHTSeq))

#run DESeq to format the data for subsequent analysis
dds<-DESeq(ddsHTSeq)
table(keep)

#get log transformed data for pcaExplorer
rld <- rlog(dds, blind=FALSE)

#Run pcaExplorer to visualise data
pcaExplorer(dds = dds, dst = rld)

hist(log(phenodata$HAZ))

#Get differential expression by infection intensity
resCasCon <- results(dds, contrast=c("pheno","CAS","CON"))
resCasConHC <- results(dds, contrast=c("pheno","High","Neg"))
resCasConHL <- results(dds, contrast=c("pheno","High","Low"))
resCasConLC <- results(dds, contrast=c("pheno","Low","Neg"))

#Get differential expression associated with BMI
resBMI <- results(dds,name = "BMI")

#Get differential expression associated with Stunting
resStunt <- results(dds,name = "stunt")

#Load gene annotation data
#EnsGeneNames <- read.delim("~/Documents/TrypanoGEN/rnaseq/index/EnsGeneNames.2.txt", header=TRUE,
row.names=1)

```

```
EnsGeneNames <- read.delim ("~/Desktop/Albert_finalRNAseq/EnsGeneNames.2.txt", header=TRUE,
row.names=1)
```

```
resCasCon$GeneName =
EnsGeneNames$GeneName[match(rownames(resCasCon),rownames(EnsGeneNames))]
resCasCon$GeneType = EnsGeneNames$GeneType[match(rownames(resCasCon),rownames(EnsGeneNames))]
resCasCon$GeneDescription =
EnsGeneNames$GeneDescription[match(rownames(resCasCon),rownames(EnsGeneNames))]
resCasCon<-resCasCon[order(resCasCon$padj),]
table(resCasCon$padj <0.05)
table(resCasCon$pvalue <0.05)
table(resCasCon$log2FoldChange >1)
write.csv(file="14.0.23.IU.csv ",resCasCon)
```

```
resCasConHC$GeneName =
EnsGeneNames$GeneName[match(rownames(resCasConHC),rownames(EnsGeneNames))]
resCasConHC$GeneType =
EnsGeneNames$GeneType[match(rownames(resCasConHC),rownames(EnsGeneNames))]
resCasConHC$GeneDescription =
EnsGeneNames$GeneDescription[match(rownames(resCasConHC),rownames(EnsGeneNames))]
resCasConHC<-resCasConHC[order(resCasConHC$padj),]
table(resCasConHC$padj <0.05)
table(resCasConHC$pvalue <0.05)
write.csv(file=" read.csv("14.03.23_HC.csv",resCasConHC)
```

```
resCasConHL$GeneName =
EnsGeneNames$GeneName[match(rownames(resCasConHL),rownames(EnsGeneNames))]
resCasConHL$GeneType =
EnsGeneNames$GeneType[match(rownames(resCasConHL),rownames(EnsGeneNames))]
resCasConHL$GeneDescription =
EnsGeneNames$GeneDescription[match(rownames(resCasConHL),rownames(EnsGeneNames))]
resCasConHL<-resCasConHL[order(resCasConHL$padj),]
table(resCasConHL$padj <0.05)
table(resCasConHL$pvalue <0.05)
write.csv(file="14.03.23_HL.csv",resCasConHL)
```

```
resCasConLC$GeneName =
EnsGeneNames$GeneName[match(rownames(resCasConLC),rownames(EnsGeneNames))]
resCasConLC$GeneType =
EnsGeneNames$GeneType[match(rownames(resCasConLC),rownames(EnsGeneNames))]
resCasConLC$GeneDescription =
EnsGeneNames$GeneDescription[match(rownames(resCasConLC),rownames(EnsGeneNames))]
resCasConLC<-resCasConLC[order(resCasConLC$padj),]
table(resCasConLC$padj <0.05)
table(resCasConLC$pvalue <0.05)
write.csv(file="14.03.23_LC.csv ",resCasConLC)
resBMI$GeneName = EnsGeneNames$GeneName[match(rownames(resBMI),rownames(EnsGeneNames))]
resBMI$GeneType = EnsGeneNames$GeneType[match(rownames(resBMI),rownames(EnsGeneNames))]
resBMI$GeneDescription =
EnsGeneNames$GeneDescription[match(rownames(resBMI),rownames(EnsGeneNames))]
resBMI<-resBMI[order(resBMI$padj),]
```

```
table(resBMI$padj <0.05)
table(resBMI$pvalue <0.05)
table(resBMI$log2FoldChange >1)
write.csv(file="04.01.2023.Final_Albertine.BMI.csv",resBMI)
```

```
resStunt$GeneName = EnsGeneNames$GeneName[match(rownames(resStunt),rownames(EnsGeneNames))]
resStunt$GeneType = EnsGeneNames$GeneType[match(rownames(resStunt),rownames(EnsGeneNames))]
resStunt$GeneDescription =
EnsGeneNames$GeneDescription[match(rownames(resStunt),rownames(EnsGeneNames))]
resStunt<-resStunt[order(resStunt$padj),]
table(resStunt$padj <0.05)
table(resStunt$pvalue <0.05)
table(resStunt$log2FoldChange >1)
write.csv(file="13.03.23_Stuntsex.csv",resStunt)
```

```
#making volcano plot of DE genes
#BiocManager::install('EnhancedVolcano')
```

```
library(EnhancedVolcano)
library(org.Hs.eg.db)
```

```
resCasCon = read.csv("14.0.23.IU.csv", row.names = 1)
ens <- rownames(resCasCon)
symbols <- mapIds(org.Hs.eg.db, keys = ens,
                 column = c('SYMBOL'), keytype = 'ENSEMBL')
symbols <- symbols[match(rownames(resCasCon), names(symbols))]
VolCasCon = EnhancedVolcano(resCasCon,
                             lab = symbols,
                             x = 'log2FoldChange',
                             y = 'pvalue',
                             axisLabSize = 8,
                             title = "",
                             titleLabSize = 12,
                             subtitle = "",
                             pCutoff = 0.000104643,
                             FCcutoff = 1.0,
                             pointSize = 0.5,
                             labSize = 3.0,
                             col=c('black', 'blue', 'light green', 'red3'),
                             #boxedLabels = TRUE,
                             colAlpha = 1,
                             legendLabels=c('Not sig.', 'Log2FC', 'p-value',
                                             'p-value & Log2FC'),
                             legendPosition = 'left',
                             legendLabSize = 8,
                             legendIconSize = 2.0)
```

```
VolCasCon
```

```
resCasConHC = read.csv("14.03.23_HC.csv", row.names = 1)
ens <- rownames(resCasConHC)
symbols <- mapIds(org.Hs.eg.db, keys = ens,
```

```

        column = c('SYMBOL'), keytype = 'ENSEMBL')
symbols <- symbols[match(rownames(resCasConHC), names(symbols))]
VolCasConHC = EnhancedVolcano(resCasConHC,
    lab = symbols,
    x = 'log2FoldChange',
    y = 'pvalue',
    axisLabSize = 8,
    title = "",
    titleLabSize = 12,
    subtitle = "",
    pCutoff = 0.0012653,
    FCcutoff = 1.0,
    pointSize = 0.5,
    labSize = 3.0,
    col=c('black', 'blue', 'light green', 'red3'),
    colAlpha = 1,
    legendLabels=c('Not sig.', 'Log2FC', 'p-value',
    'p-value & Log2FC'),
    legendPosition = 'right',
    legendLabSize = 8,
    legendIconSize = 2.0)
VolCasConHC

```

```

resCasConHL = read.csv("14.03.23_HL.csv", row.names = 1)
ens <- rownames(resCasConHL)
symbols <- mapIds(org.Hs.eg.db, keys = ens,
    column = c('SYMBOL'), keytype = 'ENSEMBL')
symbols <- symbols[match(rownames(resCasConHL), names(symbols))]

```

```

VolCasConHL = EnhancedVolcano(resCasConHL,
    lab = symbols,
    x = 'log2FoldChange',
    y = 'pvalue',
    axisLabSize = 8,
    title = "",
    titleLabSize = 12,
    subtitle = "",
    pCutoff = 0.00240429,
    FCcutoff = 1.0,
    pointSize = 0.5,
    labSize = 3.0,
    col=c('black', 'blue', 'light green', 'red3'),
    colAlpha = 1,
    legendLabels=c('Not sig.', 'Log2FC', 'p-value',
    'p-value & Log2FC'),
    legendPosition = 'left',
    legendLabSize = 8,
    legendIconSize = 2.0)
VolCasConHL

```

```

resCasConLC = read.csv("14.03.23_LC.csv", row.names = 1)

```

```

ens <- rownames(resCasConLC)
symbols <- mapIds(org.Hs.eg.db, keys = ens,
                 column = c('SYMBOL'), keytype = 'ENSEMBL')
symbols <- symbols[match(rownames(resCasConLC), names(symbols))]

```

```

VolCasConLC = EnhancedVolcano(resCasConLC,
                              lab = symbols,
                              x = 'log2FoldChange',
                              y = 'pvalue',
                              axisLabSize = 8,
                              title = "",
                              titleLabSize = 12,
                              subtitle = "",
                              pCutoff = 0.0001,
                              FCcutoff = 1.0,
                              pointSize = 0.5,
                              labSize = 3.0,
                              col=c('black', 'blue', 'light green', 'red3'),
                              colAlpha = 1,
                              legendLabels=c('Not sig.', 'Log2FC', 'p-value',
                                               'p-value & Log2FC'),
                              legendPosition = 'right',
                              legendLabSize = 8,
                              legendIconSize = 2.0)

```

VolCasConLC

```

install.packages("cowplot")
library(cowplot)
plot_grid(VolCasCon, VolCasConHC, VolCasConHL, VolCasConLC, nrow = 2, labels = c("A", "B", "C", "D"))
resStunt = read.csv("13.03.23_Stuntsex.csv", row.names = 1)
ens <- rownames(resStunt)
symbols <- mapIds(org.Hs.eg.db, keys = ens,
                 column = c('SYMBOL'), keytype = 'ENSEMBL')
symbols <- symbols[match(rownames(resStunt), names(symbols))]

```

```

VolresStunt = EnhancedVolcano(resStunt,
                              lab = symbols,
                              x = 'log2FoldChange',
                              y = 'pvalue',
                              axisLabSize = 10,
                              title = "",
                              titleLabSize = 12,
                              pCutoff = 1.91E-06,
                              FCcutoff = 1.0,
                              pointSize = 2.0,
                              labSize = 3.0,
                              col=c('black', 'blue', 'light green', 'red3'),
                              colAlpha = 1,
                              legendLabels=c('Not sig.', 'Log2FC', 'p-value',
                                               'p-value & Log2FC'),
                              legendPosition = 'right',
                              legendLabSize = 8,
                              legendIconSize = 2.0)

```

```
      'p-value & Log2FC'),  
  legendPosition = 'right',  
  legendLabSize = 12,  
  legendIconSize = 4.0)
```

VolresStunt

```
resBMI = read.csv("Final_Albertine.BMI.csv", row.names = 1)  
ens <- rownames(resBMI)  
symbols <- mapIds(org.Hs.eg.db, keys = ens,  
  column = c('SYMBOL'), keytype = 'ENSEMBL')  
symbols <- symbols[match(rownames(resBMI), names(symbols))]
```

```
VolresBMI = EnhancedVolcano(resBMI,  
  lab = symbols,  
  x = 'log2FoldChange',  
  y = 'pvalue',  
  axisLabSize = 10,  
  title = '',  
  titleLabSize = 12,  
  pCutoff = 1.44E-05,  
  FCcutoff = 1.10,  
  pointSize = 2.0,  
  labSize = 3.0,  
  col=c('black', 'blue', 'light green', 'red3'),  
  colAlpha = 1,  
  legendLabels=c('Not sig.', 'Log2FC', 'p-value',  
    'p-value & Log2FC'),  
  legendPosition = 'right',  
  legendLabSize = 12,  
  legendIconSize = 4.0)
```

VolresBMI

```
plot_grid(VolresStunt, VolresBMI, nrow = 2, labels = c("A", "B"))
```

```
#####
```
